# Supplementary material
Source: PubMed Central journal article supplement (PMC7261055)
Supplement: pnas.1920570117.sapp.pdf [file pnas.1920570117.sapp.pdf]

## Supplementary Information

### ***The molecular basis of how buried human leukocyte antigen polymorphism modulates Natural Killer Cell function***

Philippa M. Saunders<sup>1\*</sup>, Bruce J. MacLachlan<sup>2\*</sup>, Phillip Pymm<sup>2,3</sup>, Patricia T. Illing<sup>2</sup>, Yuanchen Deng<sup>1</sup>, Shu Cheng Wong<sup>1</sup>, Clare V. L. Oates<sup>1</sup>, Anthony W. Purcell<sup>2</sup>, Jamie Rossjohn<sup>2,3,4\*\*</sup>, Julian P. Vivian<sup>2,3\*\*</sup> & Andrew G. Brooks<sup>1\*\*</sup>

2 supplementary figures

2 supplementary tables

Supplementary Figure 1

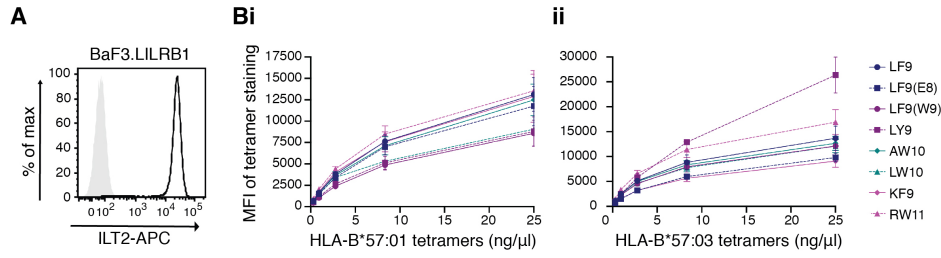

**Supplementary Figure 1. Validation of HLA-B57 tetramers staining on LILRB1-expressing cells.**

A. LILRB1 was detected on BaF3.LILRB1 cells, staining with ILT2-APC. B. HLA-B\*57:01 (i) and HLA-B\*57:03 (ii) tetramers refolded with each peptide (LF9, LF9(E8), LF9(W9), LY9), AW10, LW10, KF9 or RW11) were diluted three-fold and used to stain LILRB1-expressing Ba/F3 cells. The MFI of tetramer staining was plotted, with the average of two experiments depicted with the SEM.

Supplementary Figure 2

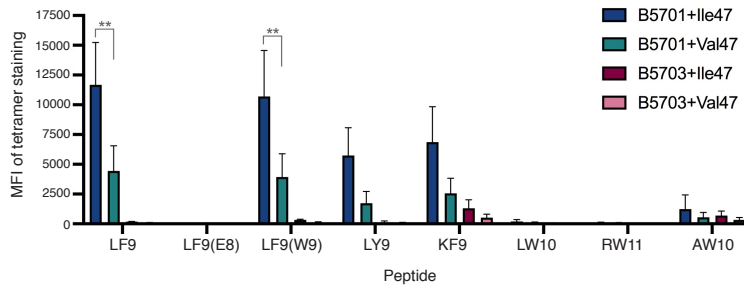

**Supplementary Figure 2: HLA-B\*57:01 tetramers bind KIR3DL1<sup>Ile47+</sup> NK cells more robustly than KIR3DL1<sup>Val47+</sup> NK cells.** NK cells sorted and expanded from four KIR3DL1<sup>+</sup> donors were stained with PE-conjugated HLA-B\*57:01 and HLA-B\*57:03 tetramers loaded with eight different peptides (at 25ng/ $\mu$ l). The MFI of tetramer binding to the NK cells was stratified by HLA-B57 tetramer and KIR3DL1 subtype, where donors DD and DK possess KIR3DL1 allotypes with an isoleucine at residue 47, and donors DE and DJ a valine. Binding of HLA-B57 tetramers to KIR3DL1<sup>+</sup> NK cells (two independent experiments with two donors each; SEM depicted) was compared using a two way ANOVA with Tukey's multiple comparison test (*HLA-B\*57:01/LF9 Ile47 vs. Val47: \*\*p=0.0026; HLA-B\*57:01/LF9(W9) Ile47 vs Val47 \*\*p=0.0050*).

**Supplementary Table 1: Peptides refolded with HLA-B\*57:01 and HLA-B\*57:03**

| Name        | Sequence           | Source                                                                                       | Notes                                |
|-------------|--------------------|----------------------------------------------------------------------------------------------|--------------------------------------|
| LF9         | LSSPVTKSF          | Immunoglobulin kappa constant<br>(sp P01834 IGKC_HUMAN)                                      | Facilitates KIR3DL1<br>binding (12)  |
| LF9<br>(E8) | LSSPVTK <u>E</u> F |                                                                                              | E8 abrogates KIR3DL1<br>binding (12) |
| LF9<br>(W9) | LSSPVTK <u>S</u> W |                                                                                              | “Flipped” C-2 (2)                    |
| LY9         | LTVQVARVY          | UPF0769 protein C21orf59<br>(sp P57076 CU059_HUMAN)                                          | “Flipped” C-2 (2)                    |
| AW10        | ASLNLPVSW          | Catenin alpha-1<br>(sp P35221 CTNA1_HUMAN)                                                   |                                      |
| KF9         | KSFDFHFGF          | Protein unc-119 homolog A<br>(sp Q13432 U119A_HUMAN)                                         |                                      |
| LW10        | LALSPVPSHW         | B-cell antigen receptor complex-<br>associated protein beta chain<br>(sp P40259 CD79B_HUMAN) |                                      |
| RW11        | RVLPPSHRVTW        | Proto-oncogene vav<br>(sp P15498 VAV_HUMAN)                                                  |                                      |

**Supplementary Table 2: Data collection and refinement statistics**

| <b>Data collection statistics</b> | <b>KIR3DL1*001-HLA-B*57:03/LSSPVTKSF</b>                                                             | <b>HLA-B*57:03/LSSPVTKSF</b>                                                                         | <b>HLA-B*57:01/ASLNLPVSW</b>                                                                         | <b>HLA-B*57:03/ASLNLPVSW</b>                                                                         |
|-----------------------------------|------------------------------------------------------------------------------------------------------|------------------------------------------------------------------------------------------------------|------------------------------------------------------------------------------------------------------|------------------------------------------------------------------------------------------------------|
| Space group                       | <i>P</i> 1                                                                                           | <i>P</i> 2 <sub>1</sub> 2 <sub>1</sub> 2 <sub>1</sub>                                                | <i>P</i> 2 <sub>1</sub> 2 <sub>1</sub> 2 <sub>1</sub>                                                | <i>P</i> 2 <sub>1</sub> 2 <sub>1</sub> 2 <sub>1</sub>                                                |
| Cell Dimensions                   | <i>a</i> = 51.8, <i>b</i> = 60.8, <i>c</i> = 65.4, $\alpha$ = 96.6, $\beta$ = 97.4, $\gamma$ = 109.2 | <i>a</i> = 50.9, <i>b</i> = 82.2, <i>c</i> = 110.8, $\alpha$ = 90.0, $\beta$ = 90.0, $\gamma$ = 90.0 | <i>a</i> = 50.8, <i>b</i> = 82.0, <i>c</i> = 110.5, $\alpha$ = 90.0, $\beta$ = 90.0, $\gamma$ = 90.0 | <i>a</i> = 51.0, <i>b</i> = 82.3, <i>c</i> = 110.9, $\alpha$ = 90.0, $\beta$ = 90.0, $\gamma$ = 90.0 |
| Resolution Å                      | 50 – 1.98 (2.08 – 1.98)                                                                              | 46.27– 1.60 (1.63 – 1.60)                                                                            | 46.13 – 1.27 (1.29 – 1.27)                                                                           | 46.32 - 1.30 (1.32 – 1.30)                                                                           |
| Total no. observations            | 221369 (31894)                                                                                       | 458505 (23157)                                                                                       | 821731 (35648)                                                                                       | 647166 (29099)                                                                                       |
| No. unique observations           | 50170 (7050)                                                                                         | 62191 (3036)                                                                                         | 121661 (5564)                                                                                        | 115263 (5638)                                                                                        |
| Multiplicity                      | 4.4 (4.5)                                                                                            | 7.4 (7.6)                                                                                            | 6.8 (6.4)                                                                                            | 5.6 (5.2)                                                                                            |
| Data completeness (%)             | 97.3 (93.7)                                                                                          | 100.0 (100.0)                                                                                        | 99.3 (93.0)                                                                                          | 100.0 (100.0)                                                                                        |
| 1/ $\sigma_1$                     | 10.3 (2.5)                                                                                           | 11.5 (2.6)                                                                                           | 15.1 (2.2)                                                                                           | 10.4 (2.1)                                                                                           |
| $R_{\text{merge}}^1$              | 0.076 (0.483)                                                                                        | 0.127 (1.038)                                                                                        | 0.049 (0.693)                                                                                        | 0.079 (1.049)                                                                                        |
| <b>Refinement statistics</b>      |                                                                                                      |                                                                                                      |                                                                                                      |                                                                                                      |
| Non-hydrogen atoms                |                                                                                                      |                                                                                                      |                                                                                                      |                                                                                                      |
| Protein                           | 5406                                                                                                 | 3958                                                                                                 | 3220                                                                                                 | 3228                                                                                                 |
| Sugar                             | 42                                                                                                   | -                                                                                                    | -                                                                                                    | -                                                                                                    |
| Solvent                           | 401                                                                                                  | 660                                                                                                  | 582                                                                                                  | 515                                                                                                  |
|                                   |                                                                                                      |                                                                                                      |                                                                                                      |                                                                                                      |
| $R_{\text{factor}} (\%)^2$        | 19.0                                                                                                 | <b>16.3</b>                                                                                          | 13.8                                                                                                 | 14.1                                                                                                 |
| $R_{\text{free}} (\%)^2$          | 23.6                                                                                                 | 19.5                                                                                                 | 16.0                                                                                                 | 16.8                                                                                                 |
| r.m.s.d. from ideality            |                                                                                                      |                                                                                                      |                                                                                                      |                                                                                                      |
| Bond lengths (Å)                  | 0.005                                                                                                | 0.011                                                                                                | 0.007                                                                                                | 0.008                                                                                                |
| Bond angles (°)                   | 1.040                                                                                                | 1.150                                                                                                | 0.970                                                                                                | 0.970                                                                                                |
| Dihedrals (°)                     | 13.0                                                                                                 | 8.846                                                                                                | 8.094                                                                                                | 9.146                                                                                                |
| Ramachandran plot                 |                                                                                                      |                                                                                                      |                                                                                                      |                                                                                                      |
| Favoured regions (%)              | 96.23                                                                                                | 98.68                                                                                                | 98.68                                                                                                | 98.42                                                                                                |
| Allowed regions (%)               | 3.77                                                                                                 | 1.32                                                                                                 | 1.32                                                                                                 | 1.58                                                                                                 |
| B-factors (Å <sup>2</sup> )       |                                                                                                      |                                                                                                      |                                                                                                      |                                                                                                      |
| Average main chain                | 37.3                                                                                                 | 18.9                                                                                                 | 21.3                                                                                                 | 20.9                                                                                                 |
| Average side chain                | 43.3                                                                                                 | 26.6                                                                                                 | 27.5                                                                                                 | 26.4                                                                                                 |
| Average sugar                     | 66.3                                                                                                 | -                                                                                                    | -                                                                                                    | -                                                                                                    |
| Average solvent                   | 42.9                                                                                                 | 34.7                                                                                                 | 33.9                                                                                                 | 31.8                                                                                                 |

$$^1 R_{\text{merge}} = \sum_{\text{hkl}} \sum_j |I_{\text{hkl},j} - \langle I_{\text{hkl}} \rangle| / \sum_{\text{hkl}} \sum_j I_{\text{hkl},j}$$

$$^2 R_{\text{factor}} = \sum_{\text{hkl}} \left\| \frac{|F_o| - |F_c|}{\sum_{\text{hkl}} |F_o|} \right\| \text{ for all data excluding the 5\% that comprised the } R_{\text{free}} \text{ used for cross-validation.}$$
